# Supplementary material
Source: publisher site journal article supplement (https://www.dovepress.com/article/448713)
Supplement: Supplementary file 1 [file get_supplementary_file.php]

|  |
| --- |
|  |

**Table S1** RSNA Chest CT Classification System for Reporting COVID-19 pneumonia

| COVID-19 pneumonia pattern | CT features |
| --- | --- |
| “Typical” | - Peripheral, bilateral, GGO with or without consolidation or visible intralobular lines (“crazypaving”)  - Multifocal GGO of rounded morphology with or without consolidation or visible intralobular lines (“crazy-paving”)  - Reverse halo sign or other findings of organizing pneumonia |
| “Indeterminate” | The absence of typical imaging feature of COVID-19 pneumonia and the presence of:  - Multifocal, diffuse, perihilar or unilateral GGO with or without consolidation lacking a specific distribution or features  - Few very small GGO with a non-rounded and non-peripheral distribution |
| “Atypical” | The absence of typical or indeterminate features of COVID-19 pneumonia and the presence of:  - Isolated lobar or segmental consolidation without GGO  - Nodular pattern (centrilobular, “tree- in-bud”)  - Cavitation  - Smooth interlobular septal thickening with pleural effusion |

|  |
| --- |
